# Supplementary material for: The effect of modulated electro-hyperthermia on local disease control in HIV-positive and -negative cervical cancer women in South Africa: Early results from a phase III randomised controlled trial
Source: PubMed Central journal article supplement (PMC6584021; doi:10.1371/journal.pone.0217894), 2019-06-19

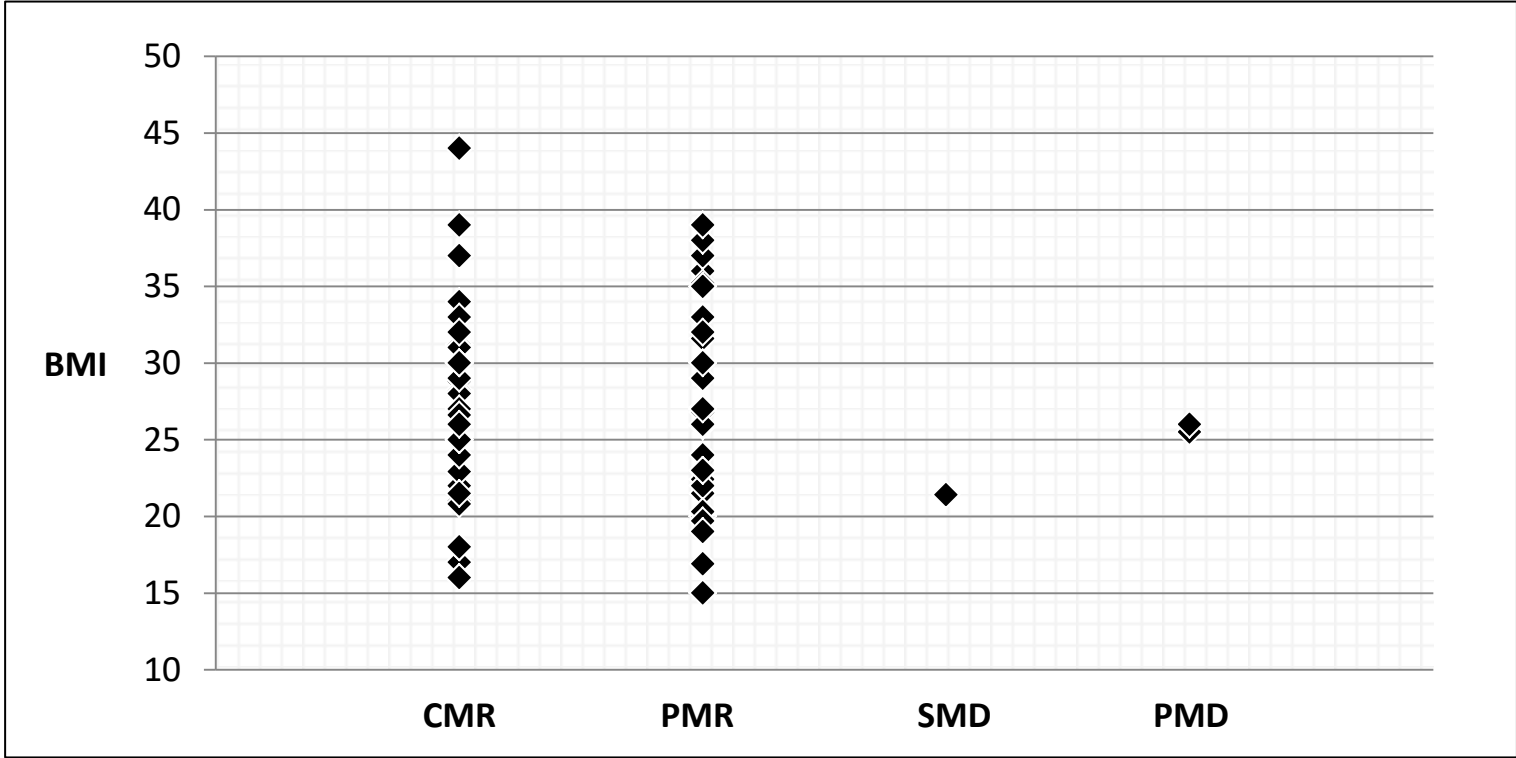

Supplement: pone.0217894.s002.pdf [file pone.0217894.s002.pdf]
